# Supplementary material for: Potent Broad-Spectrum Antibacterial Activity of Amphiphilic Peptides against Multidrug-Resistant Bacteria
Source: PubMed Central journal article supplement (PMC7564829; doi:10.3390/microorganisms8091398), 2020-09-11
Supplement: microorganisms-08-01398-s001.pdf [file microorganisms-08-01398-s001.pdf]

## Supplementary material

**Table S1 Bacterial strains used in this study.**

| Organisms and phenotypes                                         | Sources       |
|------------------------------------------------------------------|---------------|
| <b>Gram-positive bacteria</b>                                    |               |
| <i>S. aureus</i> 29213                                           | ATCC          |
| MRSA T144                                                        | In this study |
| <i>S. aureus</i> 215 (LZD <sup>R</sup> + <i>cfr</i> )            | In this study |
| <i>E. faecalis</i> A4 (VRE, VanA)                                | In this study |
| <b>Gram-negative bacteria</b>                                    |               |
| <i>E. coli</i> 25922                                             | ATCC          |
| <i>S. enteritidis</i> 13076                                      | ATCC          |
| <i>E. coli</i> B2 ( <i>mcr-1</i> + <i>bla</i> <sub>NDM-5</sub> ) | In this study |
| <i>E. coli</i> B3-1 ( <i>tet</i> (X4))                           | In this study |
| <i>E. coli</i> 1F28 ( <i>tet</i> (X4))                           | In this study |
| <i>E. coli</i> 1N28 ( <i>tet</i> (X4))                           | In this study |
| <i>E. coli</i> 1N31 ( <i>tet</i> (X4))                           | In this study |
| <i>E. coli</i> 1C1 ( <i>tet</i> (X4))                            | In this study |
| <i>E. coli</i> 1F16 ( <i>tet</i> (X4))                           | In this study |
| <i>E. coli</i> 1F31 ( <i>tet</i> (X4))                           | In this study |
| <i>E. coli</i> 1A34 ( <i>tet</i> (X4))                           | In this study |
| <i>E. coli</i> 2A19 ( <i>tet</i> (X4))                           | In this study |
| <i>E. coli</i> 2W25 ( <i>tet</i> (X4))                           | In this study |
| <i>Shigella</i> 1F25 ( <i>tet</i> (X4))                          | In this study |

ATCC, American Type Culture Collection; LZD, linezolid; RIF, rifampicin.

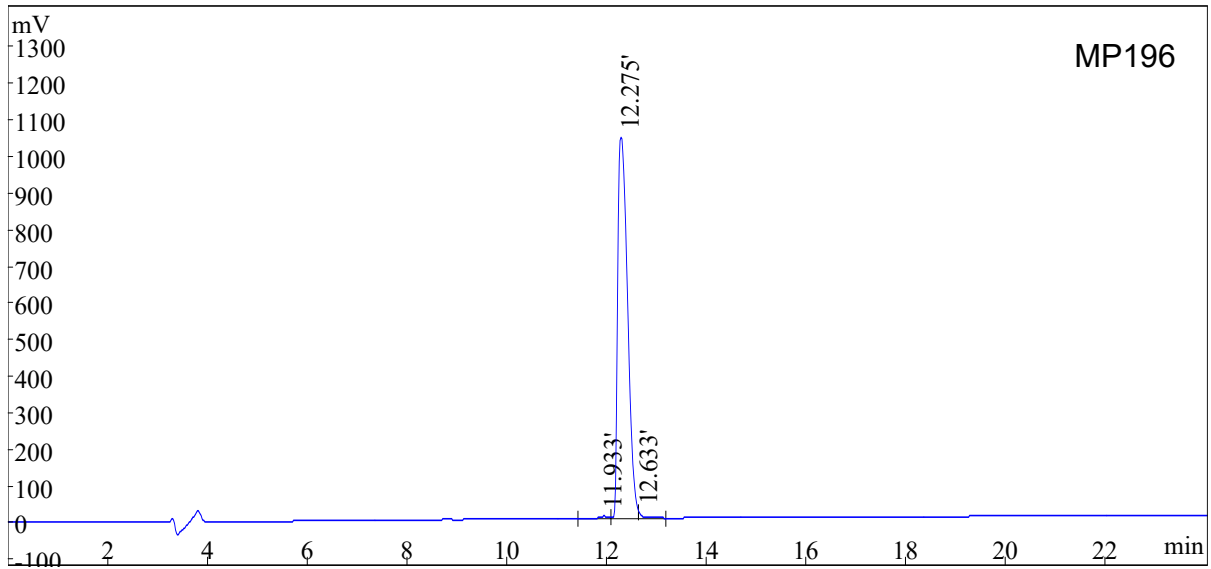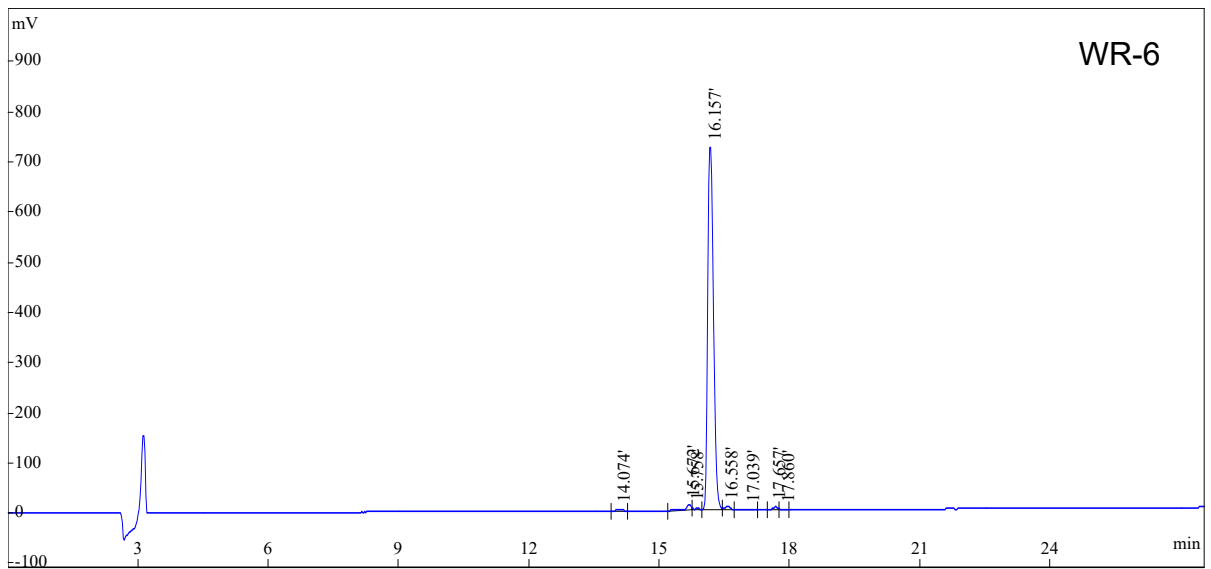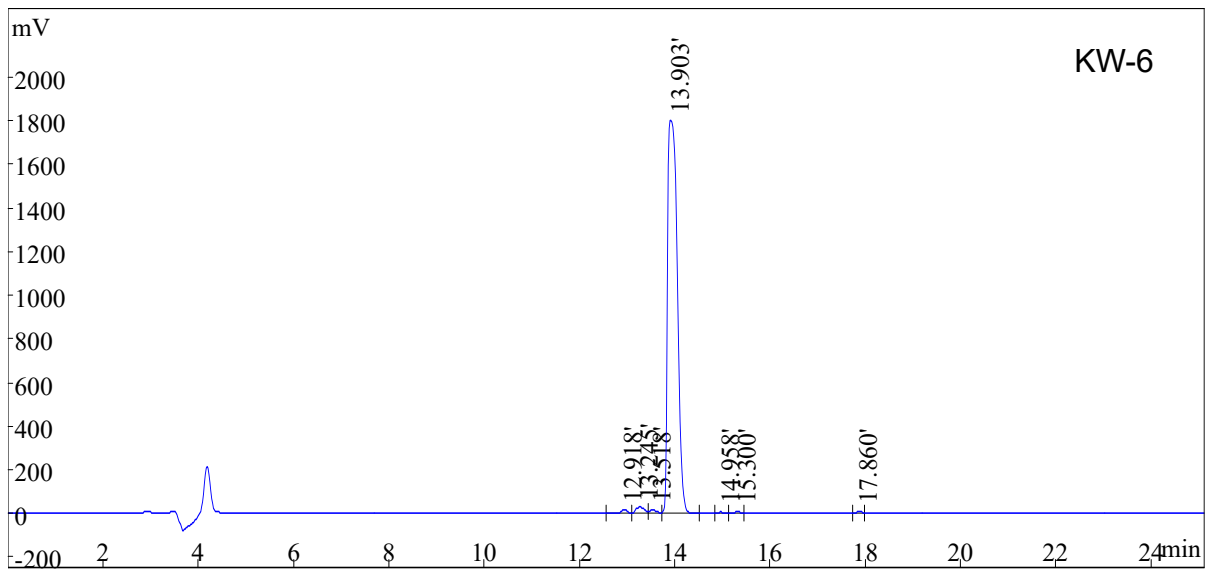

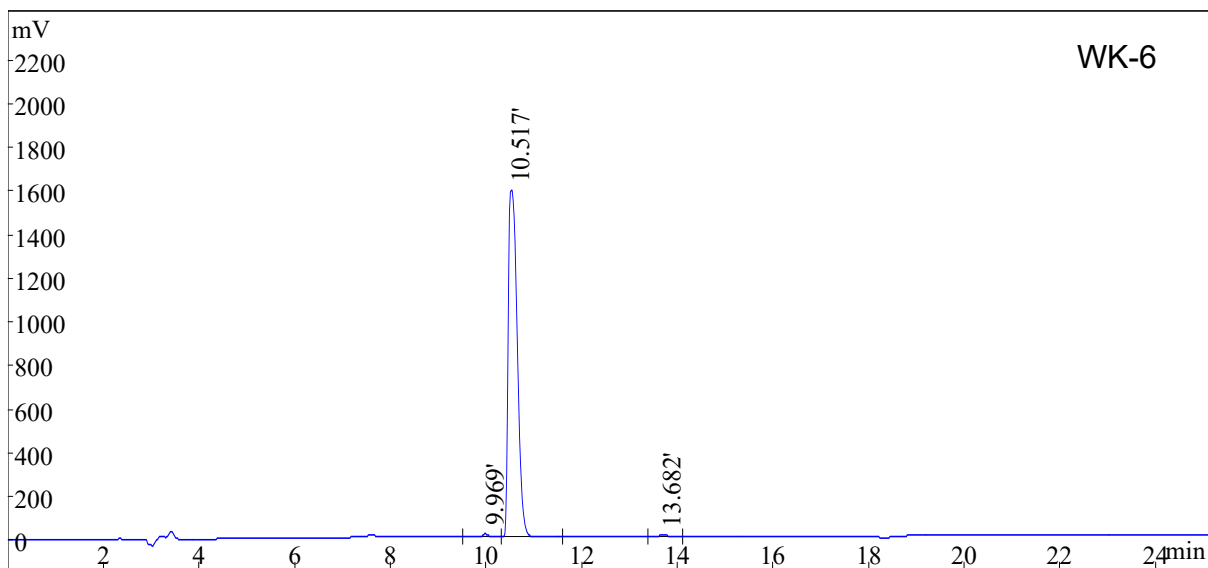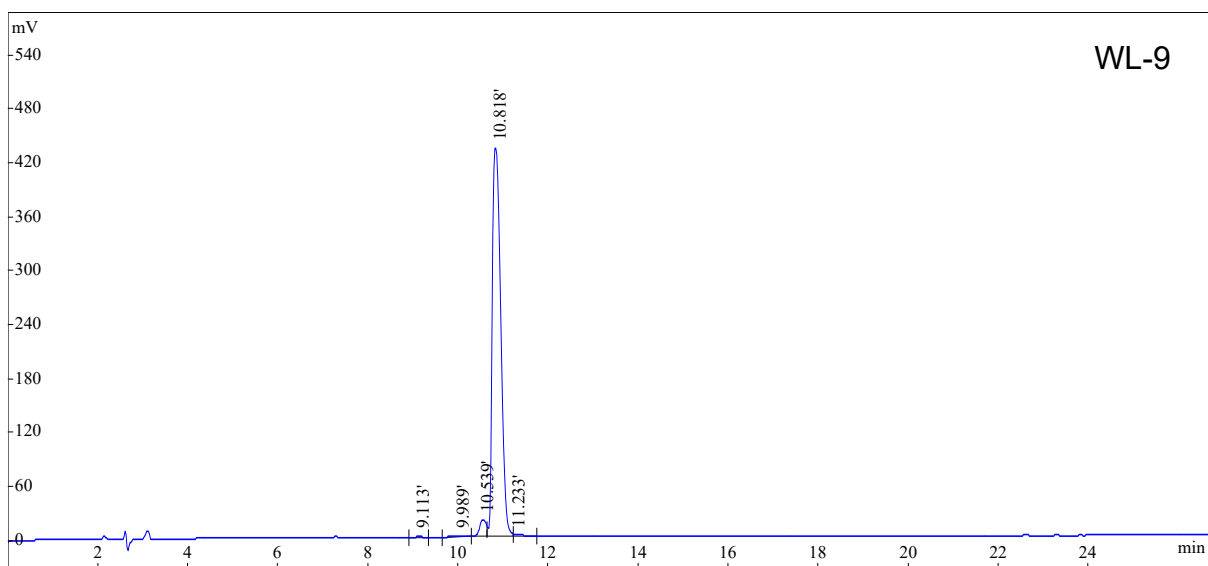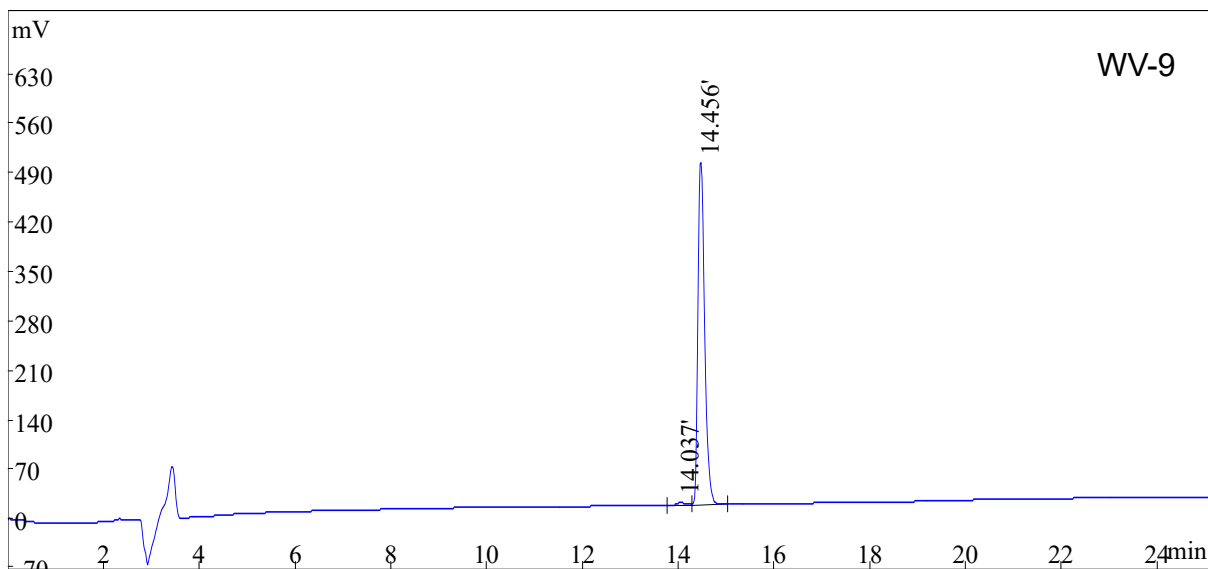

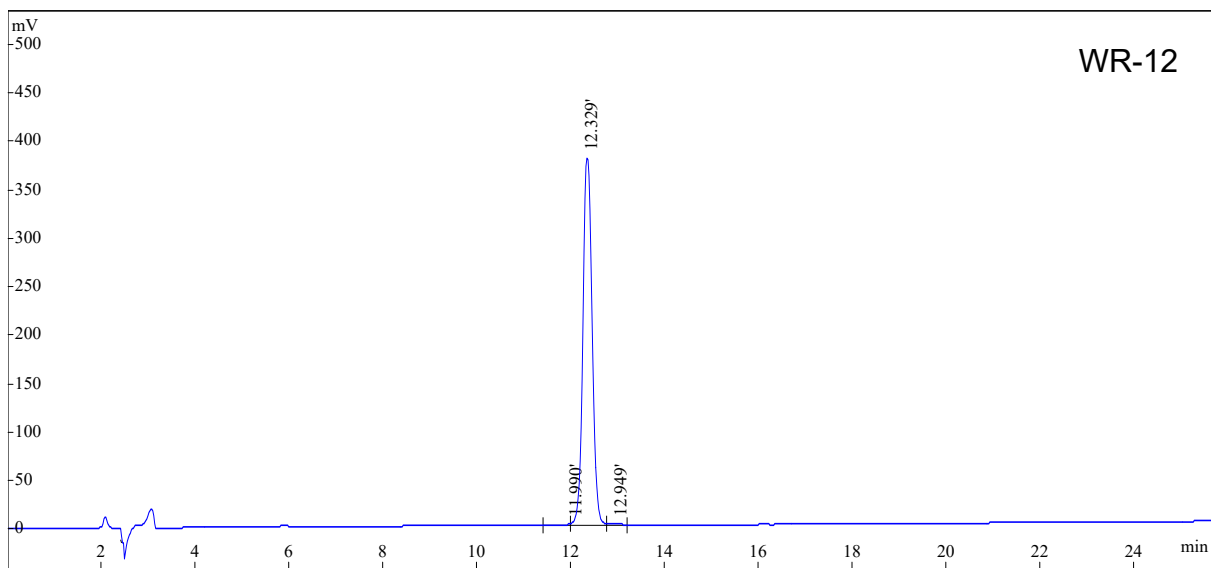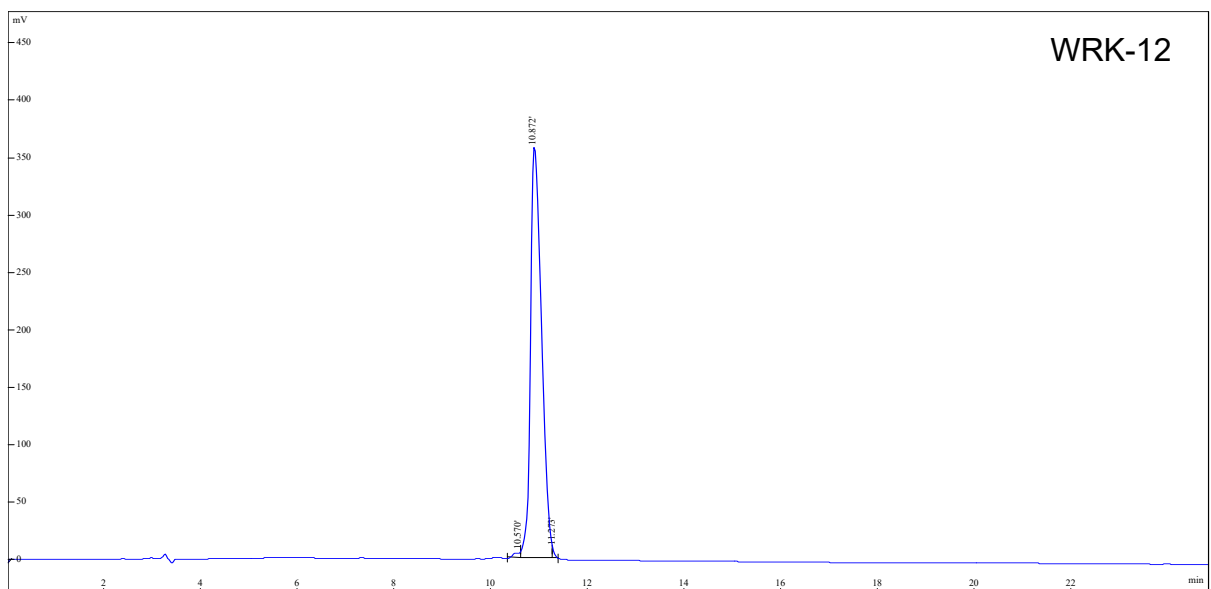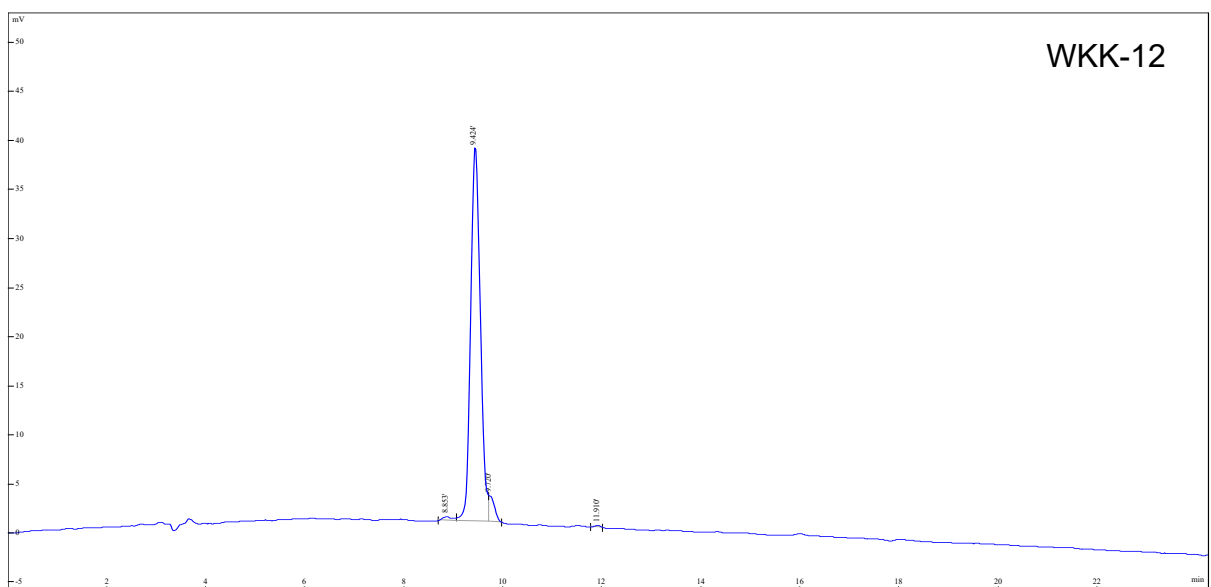

**Figure S1 HPLC spectra of engineered antimicrobial peptides on the basis of MP196.**

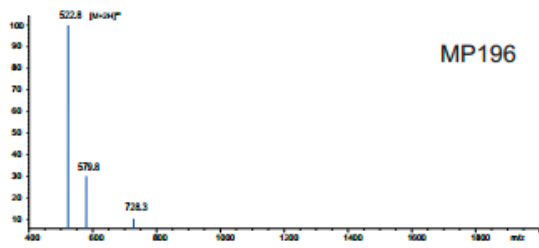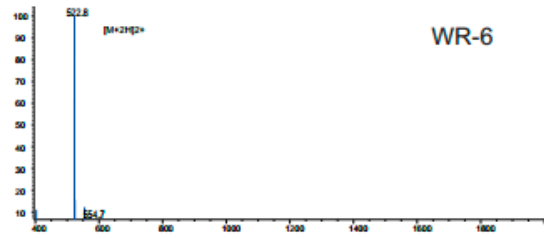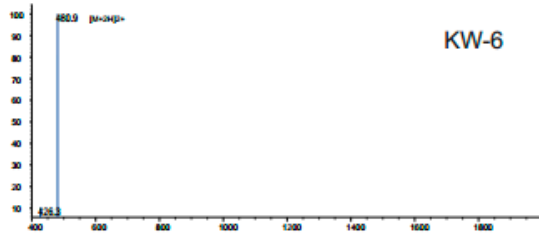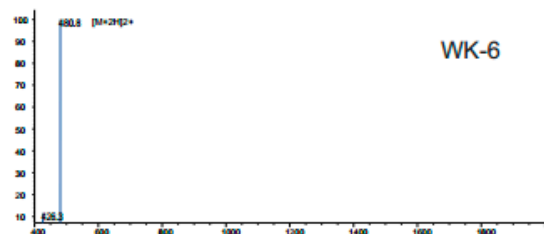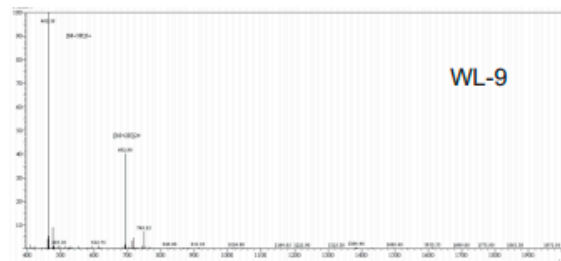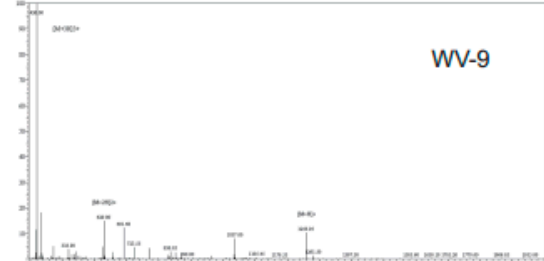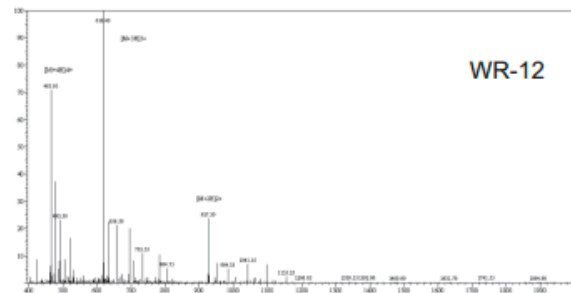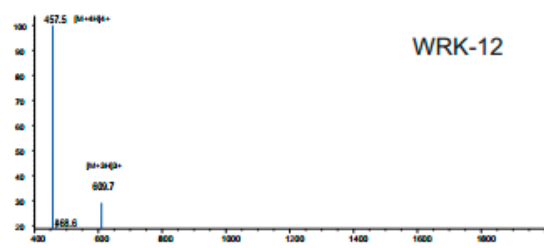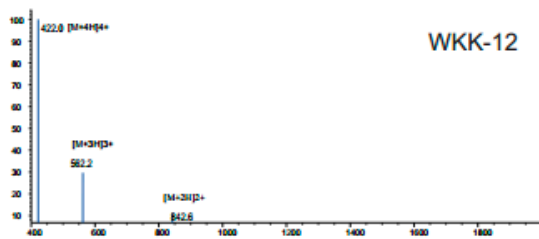

Figure S2 MS spectra of engineered antimicrobial peptides on the basis of MP196.
